# Supplementary material for: Alkyl chain length influence of the functionalized diethanolamine ligand on the slow relaxation of the magnetization in {CoIII3DyIII3} complexes
Source: Royal Society of Chemistry journal article supplement (doi:10.1039/d3dt03656a), 2024-01-01
Supplement: d3dt03656a1.pdf [file d3dt03656a1.pdf]

## Supplementary Information

### Alkyl chain length influence of the functionalized diethanolamine ligand on the slow relaxation of the magnetization in $\{\text{Co}^{\text{III}}_3\text{Dy}^{\text{III}}_3\}$

**Chlöe Bonnenfant<sup>[a,b]</sup>, Nahir Vadra<sup>[a]</sup>, Mathieu Rouzierès<sup>[c]</sup>, Rodolphe Clérac<sup>[c]</sup>,  
Fabio D. Cukiernik<sup>[a]\*</sup> and Pablo Alborés<sup>[a]\*</sup>**

[a] Departamento de Química Inorgánica, Analítica y Química Física/ INQUIMAE (CONICET), Facultad de Ciencias Exactas y Naturales Universidad de Buenos Aires, Pabellón 2, Ciudad Universitaria, C1428EHA Buenos Aires, Argentina  
Fax: +5411 / 4576-3341

e-mail: [albores@qi.fcen.uba.ar](mailto:albores@qi.fcen.uba.ar); [fabioc@qi.fcen.uba.ar](mailto:fabioc@qi.fcen.uba.ar)

[b] On leave from Ecole Européene d'Ingénieurs de Chimie, Polymères et Matériaux, Université de Strasbourg, France.

[c] Univ. Bordeaux, CNRS, CRPP, UMR 5031, 33600 Pessac, France.

**Table S1.** Main crystallographic data of the reported complexes.

|                                                               | <b>1-C<sub>4</sub></b>                                                                                                                                                                                             | <b>2-C<sub>6</sub></b>                                                                                                                                                            | <b>3-C<sub>8</sub></b>                                                                                                                                                                                             | <b>5-C<sub>3r</sub></b>                                                                                                                                                                                           |
|---------------------------------------------------------------|--------------------------------------------------------------------------------------------------------------------------------------------------------------------------------------------------------------------|-----------------------------------------------------------------------------------------------------------------------------------------------------------------------------------|--------------------------------------------------------------------------------------------------------------------------------------------------------------------------------------------------------------------|-------------------------------------------------------------------------------------------------------------------------------------------------------------------------------------------------------------------|
| Empirical Formula                                             | C <sub>59</sub> H <sub>122</sub> Co <sub>3</sub> Dy <sub>3</sub> N <sub>4</sub> O <sub>29</sub>                                                                                                                    | C <sub>65</sub> H <sub>134</sub> Co <sub>3</sub> Dy <sub>3</sub> N <sub>4</sub> O <sub>29</sub>                                                                                   | C <sub>71</sub> H <sub>148</sub> Co <sub>3</sub> Dy <sub>3</sub> N <sub>4</sub> O <sub>30</sub>                                                                                                                    | C <sub>46</sub> H <sub>90</sub> Co <sub>2</sub> Dy <sub>2</sub> N <sub>2</sub> O <sub>18</sub>                                                                                                                    |
| Formula weight                                                | 2014.88                                                                                                                                                                                                            | 2100.04                                                                                                                                                                           | 2202.22                                                                                                                                                                                                            | 1402.05                                                                                                                                                                                                           |
| <i>T</i> (K)                                                  | 293 (2)                                                                                                                                                                                                            | 293 (2)                                                                                                                                                                           | 293 (2)                                                                                                                                                                                                            | 293 (2)                                                                                                                                                                                                           |
| Crystal system                                                | Monoclinic                                                                                                                                                                                                         | Monoclinic                                                                                                                                                                        | Monoclinic                                                                                                                                                                                                         | Monoclinic                                                                                                                                                                                                        |
| Space Group                                                   | <i>Cc</i>                                                                                                                                                                                                          | <i>P2<sub>1</sub>/c</i>                                                                                                                                                           | <i>P2<sub>1</sub>/c</i>                                                                                                                                                                                            | <i>P2<sub>1</sub>/c</i>                                                                                                                                                                                           |
| <i>a</i> (Å)                                                  | 16.3759(4)                                                                                                                                                                                                         | 25.5185(18)                                                                                                                                                                       | 28.532(2)                                                                                                                                                                                                          | 16.1479(5)                                                                                                                                                                                                        |
| <i>b</i> (Å)                                                  | 19.4907(5)                                                                                                                                                                                                         | 19.1773(11)                                                                                                                                                                       | 10.5787(10)                                                                                                                                                                                                        | 14.3681(6)                                                                                                                                                                                                        |
| <i>c</i> (Å)                                                  | 27.2707(6)                                                                                                                                                                                                         | 18.9054(11)                                                                                                                                                                       | 33.001(3)                                                                                                                                                                                                          | 25.5601(8)                                                                                                                                                                                                        |
| $\alpha$ (°)                                                  | 90                                                                                                                                                                                                                 | 90                                                                                                                                                                                | 90                                                                                                                                                                                                                 | 90                                                                                                                                                                                                                |
| $\beta$ (°)                                                   | 90.159(2)                                                                                                                                                                                                          | 93.943(6)                                                                                                                                                                         | 93.753(7)                                                                                                                                                                                                          | 93.754(3)                                                                                                                                                                                                         |
| $\gamma$ (°)                                                  | 90                                                                                                                                                                                                                 | 90                                                                                                                                                                                | 90                                                                                                                                                                                                                 | 90                                                                                                                                                                                                                |
| <i>V</i> (Å <sup>3</sup> )                                    | 8704.2(4)                                                                                                                                                                                                          | 9229.9(10)                                                                                                                                                                        | 9939(1)                                                                                                                                                                                                            | 5917.6(4)                                                                                                                                                                                                         |
| <i>Z</i>                                                      | 4                                                                                                                                                                                                                  | 4                                                                                                                                                                                 | 4                                                                                                                                                                                                                  | 4                                                                                                                                                                                                                 |
| <i>D</i> <sub>calc</sub> (mg/m <sup>3</sup> )                 | 1.538                                                                                                                                                                                                              | 1.511                                                                                                                                                                             | 1.472                                                                                                                                                                                                              | 1.574                                                                                                                                                                                                             |
| Absorption coefficient (mm <sup>-1</sup> )                    | 3.171                                                                                                                                                                                                              | 2.994                                                                                                                                                                             | 2.785                                                                                                                                                                                                              | 3.111                                                                                                                                                                                                             |
| <i>F</i> (000)                                                | 4056                                                                                                                                                                                                               | 4252                                                                                                                                                                              | 4484                                                                                                                                                                                                               | 2840                                                                                                                                                                                                              |
| $\lambda$ (Å)                                                 | 0.71073                                                                                                                                                                                                            | 0.71073                                                                                                                                                                           | 0.71073                                                                                                                                                                                                            | 0.71073                                                                                                                                                                                                           |
| $\theta$ Range data collection (°)                            | 3.3 – 27.0                                                                                                                                                                                                         | 3.7 – 23.0                                                                                                                                                                        | 3.6 – 27.0                                                                                                                                                                                                         | 3.7 – 27.0                                                                                                                                                                                                        |
| Index ranges                                                  | -20 ≤ <i>h</i> ≤ 17                                                                                                                                                                                                | -32 ≤ <i>h</i> ≤ 30                                                                                                                                                               | -36 ≤ <i>h</i> ≤ 36                                                                                                                                                                                                | -20 ≤ <i>h</i> ≤ 20                                                                                                                                                                                               |
|                                                               | -24 ≤ <i>k</i> ≤ 24                                                                                                                                                                                                | -17 ≤ <i>k</i> ≤ 24                                                                                                                                                               | -13 ≤ <i>k</i> ≤ 13                                                                                                                                                                                                | -18 ≤ <i>k</i> ≤ 17                                                                                                                                                                                               |
|                                                               | -34 ≤ <i>l</i> ≤ 34                                                                                                                                                                                                | -24 ≤ <i>l</i> ≤ 23                                                                                                                                                               | -27 ≤ <i>l</i> ≤ 42                                                                                                                                                                                                | -32 ≤ <i>l</i> ≤ 31                                                                                                                                                                                               |
| Reflections collected/unique                                  | 25479 / 13127                                                                                                                                                                                                      | 41144 / 19693                                                                                                                                                                     | 51992 / 21276                                                                                                                                                                                                      | 28678 / 12689                                                                                                                                                                                                     |
| <i>R</i> <sub>int</sub>                                       | 0.0429                                                                                                                                                                                                             | 0.1111                                                                                                                                                                            | 0.1210                                                                                                                                                                                                             | 0.0484                                                                                                                                                                                                            |
| Observed reflections [ <i>I</i> > 2σ( <i>I</i> )]             | 10271                                                                                                                                                                                                              | 9691                                                                                                                                                                              | 11740                                                                                                                                                                                                              | 8498                                                                                                                                                                                                              |
| Completeness (%)                                              | 99.7                                                                                                                                                                                                               | 99.6                                                                                                                                                                              | 99.4                                                                                                                                                                                                               | 99.7                                                                                                                                                                                                              |
| Maximum / minimum transmission                                | 0.689 / 1.000                                                                                                                                                                                                      | 0.534 / 1.000                                                                                                                                                                     | 0.461 / 1.000                                                                                                                                                                                                      | 0.630 / 1.000                                                                                                                                                                                                     |
| Data/restraints/parameters                                    | 13127 / 668 / 928                                                                                                                                                                                                  | 19693 / 1834 / 1037                                                                                                                                                               | 21276 / 819 / 1097                                                                                                                                                                                                 | 12689 / 348 / 615                                                                                                                                                                                                 |
| Goodness-of-fit (GOF) on <i>F</i> <sup>2</sup>                | 1.017                                                                                                                                                                                                              | 1.059                                                                                                                                                                             | 1.057                                                                                                                                                                                                              | 1.039                                                                                                                                                                                                             |
| Final <i>R</i> -index [ <i>I</i> > 2σ( <i>I</i> )] / all data | 0.069 / 0.098                                                                                                                                                                                                      | 0.1788 / 0.2785                                                                                                                                                                   | 0.1157 / 0.1882                                                                                                                                                                                                    | 0.0551 / 0.0926                                                                                                                                                                                                   |
| <i>wR</i> index [ <i>I</i> > 2σ( <i>I</i> )] / all data       | 0.194 / 0.242                                                                                                                                                                                                      | 0.3750 / 0.4413                                                                                                                                                                   | 0.2672 / 0.3355                                                                                                                                                                                                    | 0.1282 / 0.1559                                                                                                                                                                                                   |
| Largest peak and hole (e Å <sup>-3</sup> )                    | 2.415 and -0.987                                                                                                                                                                                                   | 5.356 and -4.911                                                                                                                                                                  | 3.488 and -2.504                                                                                                                                                                                                   | 1.912 and -1.601                                                                                                                                                                                                  |
| Weights, <i>w</i>                                             | 1/[σ <sup>2</sup> ( <i>F</i> <sub>o</sub> <sup>2</sup> ) + (0.1410 <i>P</i> ) <sup>2</sup> + 136.5640 <i>P</i> ]<br>where <i>P</i> =( <i>F</i> <sub>o</sub> <sup>2</sup> +2 <i>F</i> <sub>c</sub> <sup>2</sup> )/3 | 1/[σ <sup>2</sup> ( <i>F</i> <sub>o</sub> <sup>2</sup> ) + 1274.4493 <i>P</i> ]<br>where <i>P</i> =( <i>F</i> <sub>o</sub> <sup>2</sup> +2 <i>F</i> <sub>c</sub> <sup>2</sup> )/3 | 1/[σ <sup>2</sup> ( <i>F</i> <sub>o</sub> <sup>2</sup> ) + (0.1109 <i>P</i> ) <sup>2</sup> + 192.2491 <i>P</i> ]<br>where <i>P</i> =( <i>F</i> <sub>o</sub> <sup>2</sup> +2 <i>F</i> <sub>c</sub> <sup>2</sup> )/3 | 1/[σ <sup>2</sup> ( <i>F</i> <sub>o</sub> <sup>2</sup> ) + (0.0513 <i>P</i> ) <sup>2</sup> + 43.2064 <i>P</i> ]<br>where <i>P</i> =( <i>F</i> <sub>o</sub> <sup>2</sup> +2 <i>F</i> <sub>c</sub> <sup>2</sup> )/3 |

**Table S2.** Dy-O bond distances (Å) of reported complexes.

| 1-C <sub>4</sub> |     |     |         | 2-C <sub>6</sub> |     |         | 3-C <sub>8</sub> |     |          |
|------------------|-----|-----|---------|------------------|-----|---------|------------------|-----|----------|
|                  | O22 | Dy1 | 2.31(2) | O9               | Dy1 | 2.25(2) | O8               | Dy1 | 2.27(1)  |
|                  | O6  | Dy1 | 2.32(2) | O10              | Dy1 | 2.28(2) | O9               | Dy1 | 2.29(1)  |
|                  | O8  | Dy1 | 2.34(2) | O11A             | Dy1 | 2.32(2) | O15              | Dy1 | 2.32(1)  |
|                  | O3  | Dy1 | 2.36(2) | O16              | Dy1 | 2.33(3) | O14              | Dy1 | 2.38(1)  |
|                  | O23 | Dy1 | 2.37(2) | O17              | Dy1 | 2.33(3) | O26              | Dy1 | 2.38(1)  |
|                  | O9  | Dy1 | 2.37(2) | O1               | Dy1 | 2.35(2) | O4               | Dy1 | 2.385(9) |
|                  | O1  | Dy1 | 2.39(2) | O3               | Dy1 | 2.36(2) | O2               | Dy1 | 2.388(9) |
|                  | O15 | Dy1 | 2.45(2) | O2               | Dy1 | 2.39(2) | O3               | Dy1 | 2.40(1)  |
|                  |     |     |         |                  |     |         |                  |     |          |
| mean             |     |     | 2.36(2) |                  |     | 2.33(2) |                  |     | 2.35(1)  |
| max-min          |     |     | 0.14(2) |                  |     | 0.14(2) |                  |     | 0.13(1)  |
|                  | O20 | Dy2 | 2.29(2) | O8               | Dy2 | 2.22(2) | O6               | Dy2 | 2.32(1)  |
|                  | O11 | Dy2 | 2.31(2) | O4               | Dy2 | 2.26(2) | O20              | Dy2 | 2.32(1)  |
|                  | O10 | Dy2 | 2.34(2) | O7               | Dy2 | 2.34(2) | O21              | Dy2 | 2.34(1)  |
|                  | O25 | Dy2 | 2.36(2) | O24              | Dy2 | 2.37(3) | O7               | Dy2 | 2.35(1)  |
|                  | O24 | Dy2 | 2.36(2) | O1               | Dy2 | 2.37(2) | O18              | Dy2 | 2.37(1)  |
|                  | O1  | Dy2 | 2.38(2) | O27              | Dy2 | 2.39(2) | O4               | Dy2 | 2.372(9) |
|                  | O5  | Dy2 | 2.38(2) | O25              | Dy2 | 2.41(3) | O2               | Dy2 | 2.381(9) |
|                  | O3  | Dy2 | 2.39(2) | O2               | Dy2 | 2.44(2) | O1               | Dy2 | 2.40(1)  |
|                  |     |     |         |                  |     |         |                  |     |          |
| mean             |     |     | 2.35(2) |                  |     | 2.35(2) |                  |     | 2.36(1)  |
| max-min          |     |     | 0.10(2) |                  |     | 0.22(2) |                  |     | 0.08(1)  |
|                  | O13 | Dy3 | 2.29(2) | O6               | Dy3 | 2.15(3) | O5               | Dy3 | 2.28(1)  |
|                  | O2  | Dy3 | 2.31(2) | O5               | Dy3 | 2.28(2) | O10              | Dy3 | 2.29(1)  |
|                  | O18 | Dy3 | 2.32(2) | O20              | Dy3 | 2.29(3) | O2               | Dy3 | 2.35(1)  |
|                  | O12 | Dy3 | 2.35(2) | O21              | Dy3 | 2.34(2) | O24              | Dy3 | 2.35(1)  |
|                  | O1  | Dy3 | 2.38(2) | O1               | Dy3 | 2.38(2) | O11              | Dy3 | 2.36(1)  |
|                  | O9  | Dy3 | 2.39(1) | O14              | Dy3 | 2.39(2) | O1               | Dy3 | 2.36(1)  |
|                  | O5  | Dy3 | 2.40(2) | O3               | Dy3 | 2.44(2) | O3               | Dy3 | 2.384(9) |
|                  | O27 | Dy3 | 2.41(2) | O4               | Dy3 | 2.44(2) | O25              | Dy3 | 2.42(1)  |
|                  |     |     |         |                  |     |         |                  |     |          |
| mean             |     |     | 2.36(2) |                  |     | 2.34(2) |                  |     | 2.35(1)  |
| max-min          |     |     | 0.12(2) |                  |     | 0.29(2) |                  |     | 0.14(1)  |

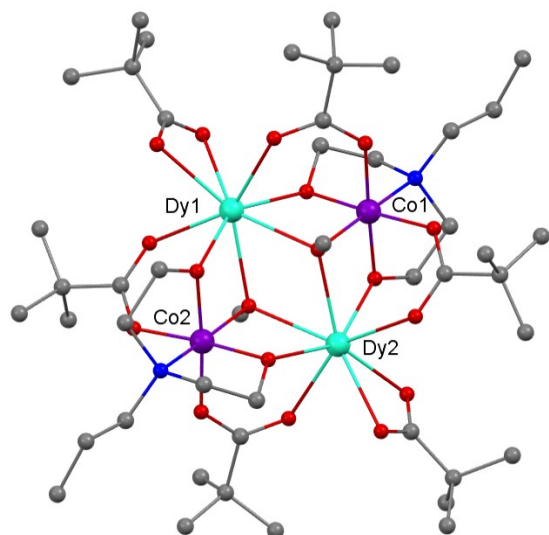

**Figure S1.** Ball and stick molecular representation of complex **5-C<sub>3r</sub>**. Disordered atoms and H atoms were omitted for sake of clarity.

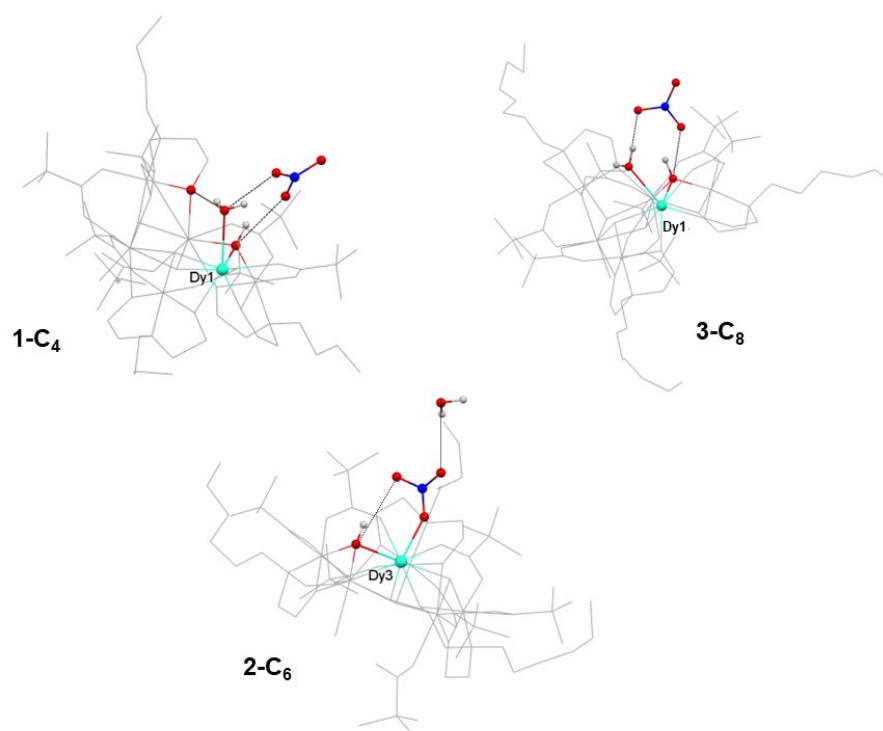

**Figure S2.** Intra-molecular H-bond interaction involving the nitrate ion as ligand and counterion in the reported complexes. Red: O; Blue: N; White: H. Molecule backbone in gray wireframes.

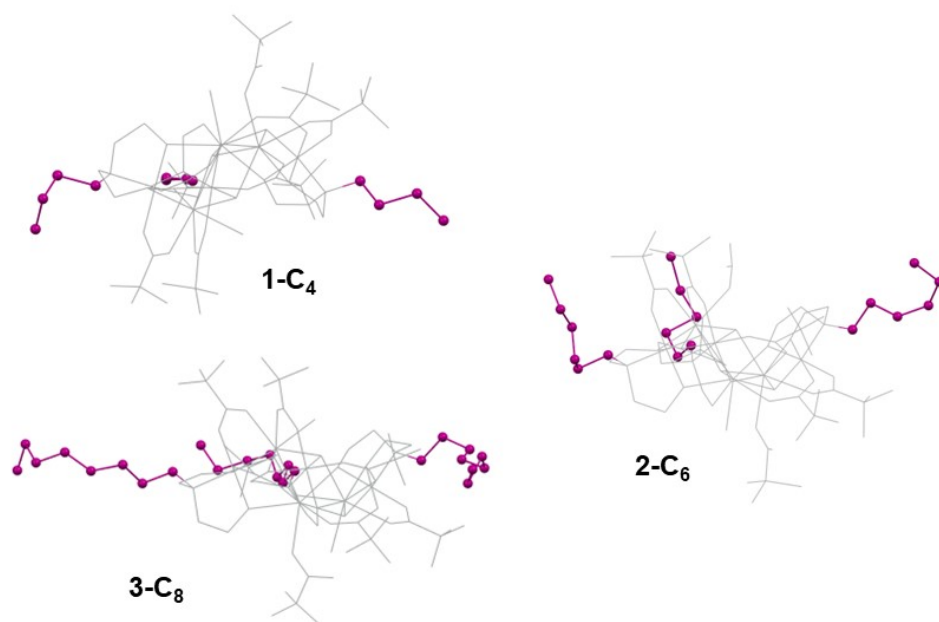

**Figure S3.** Alkyl chains orientation with respect to molecular plane in the reported complexes.

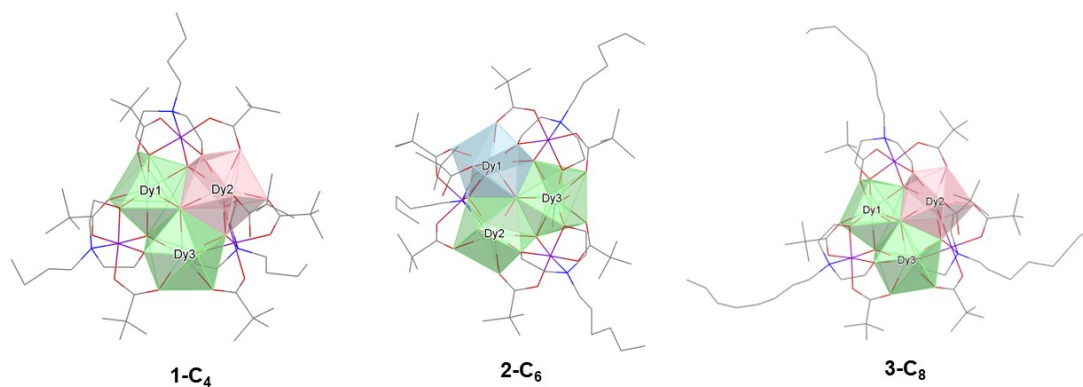

**Figure S4.** Polyhedral representation of Dy(III) sites in the reported complexes. Colours reflect closest geometrical symmetry according to CShM values (see text). Light green: BTP; pink: TDD and light blue: SAP.

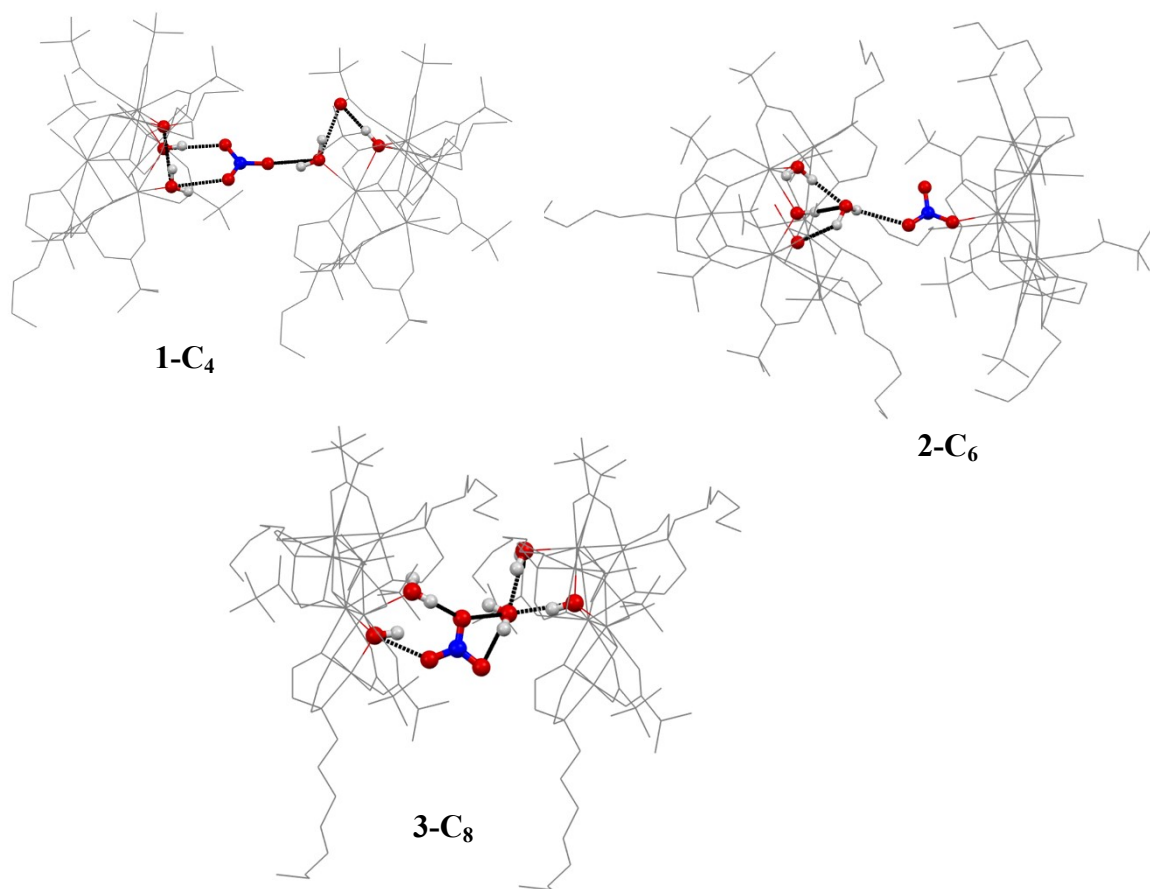

**Figure S5.** Inter-molecular H-interaction mediated by the nitrate counterion (ligand in 2-C<sub>6</sub>). H atoms omitted for sake of clarity except for the ones involved in the H-bonding. Red: oxygen; Blue: nitrogen; White: hydrogen.

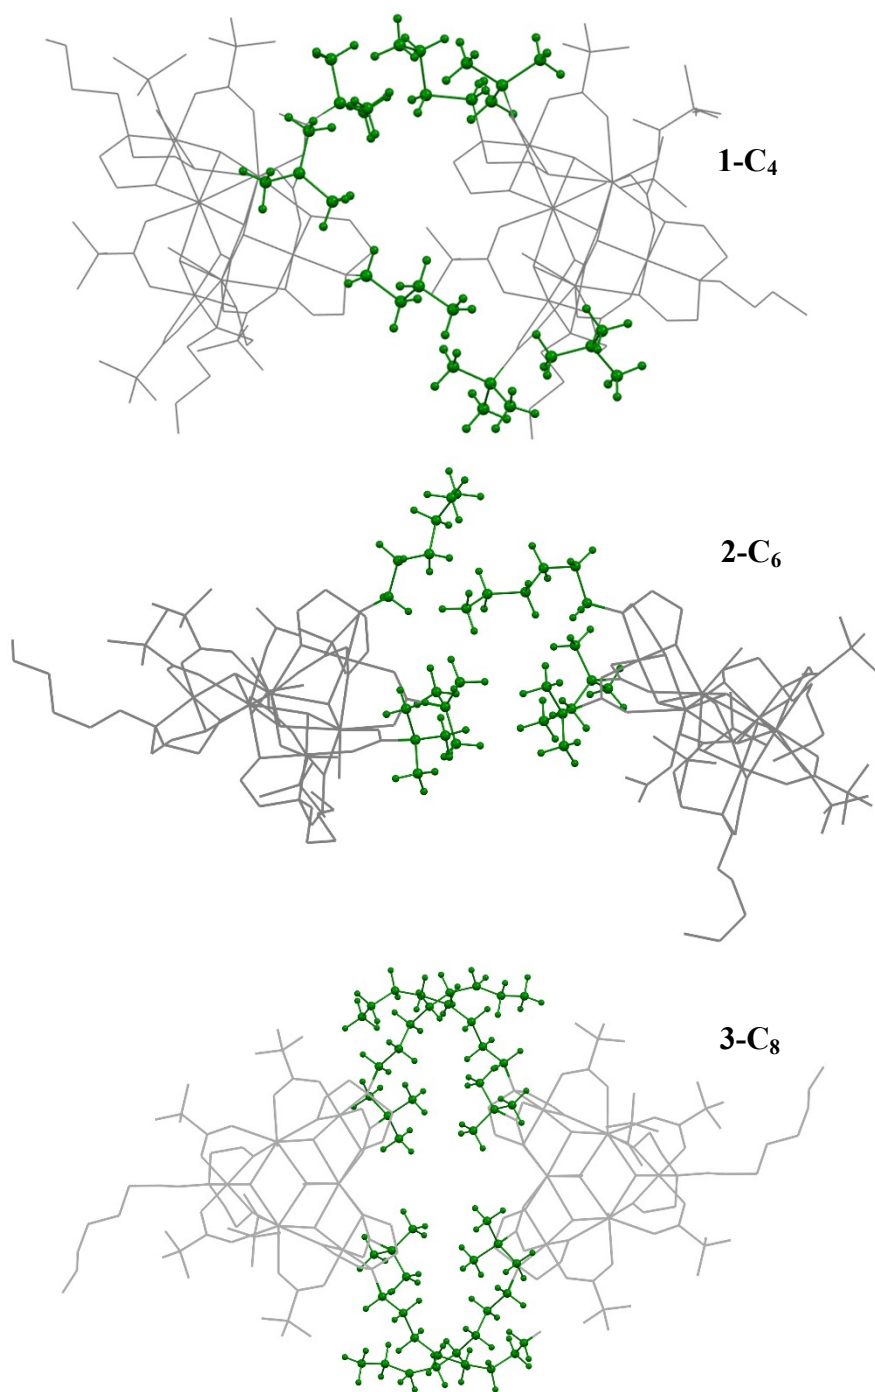

**Figure S6.** Inter-molecular C-H...C-H interactions mediated by the alkyl chains and pivalate *tert*-butyl groups (green). H atoms omitted for sake of clarity except for the ones involved in the inter-molecular interaction.

1-C<sub>4</sub>

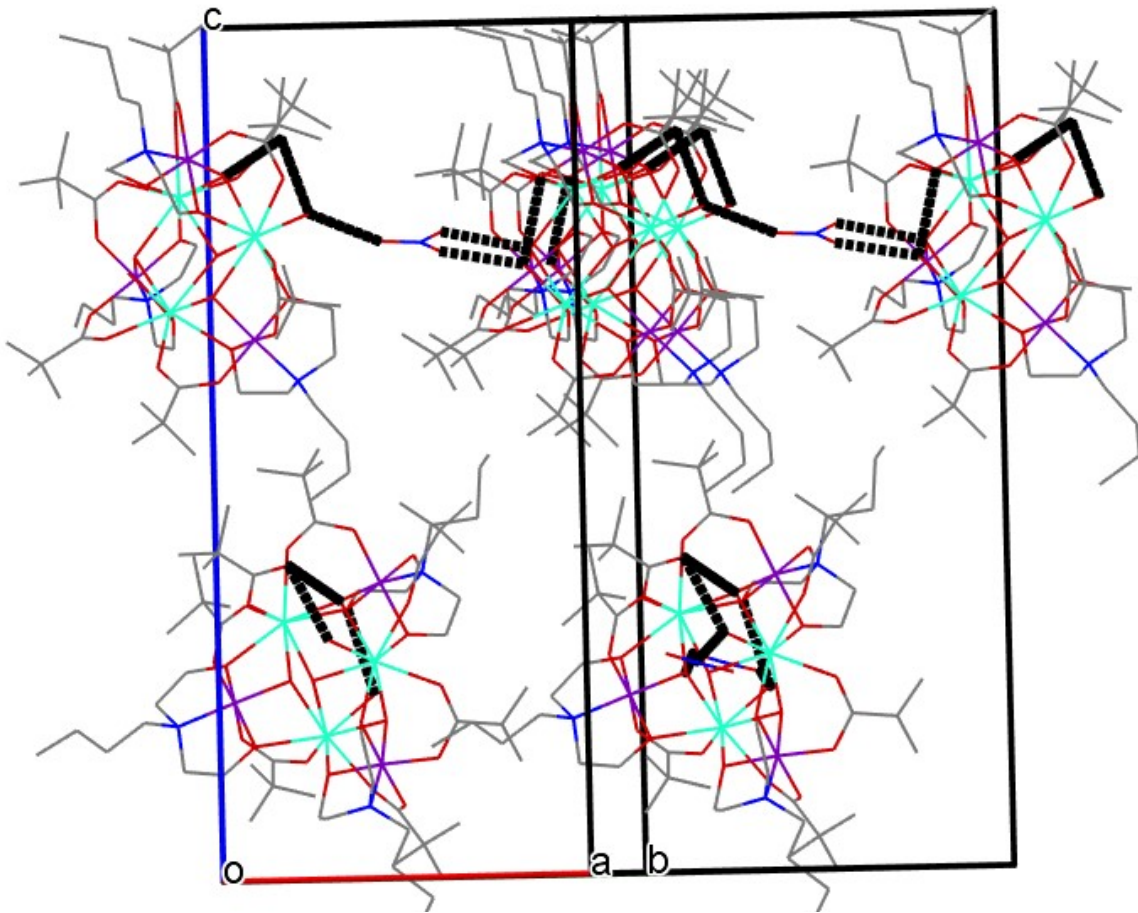

2-C<sub>6</sub>

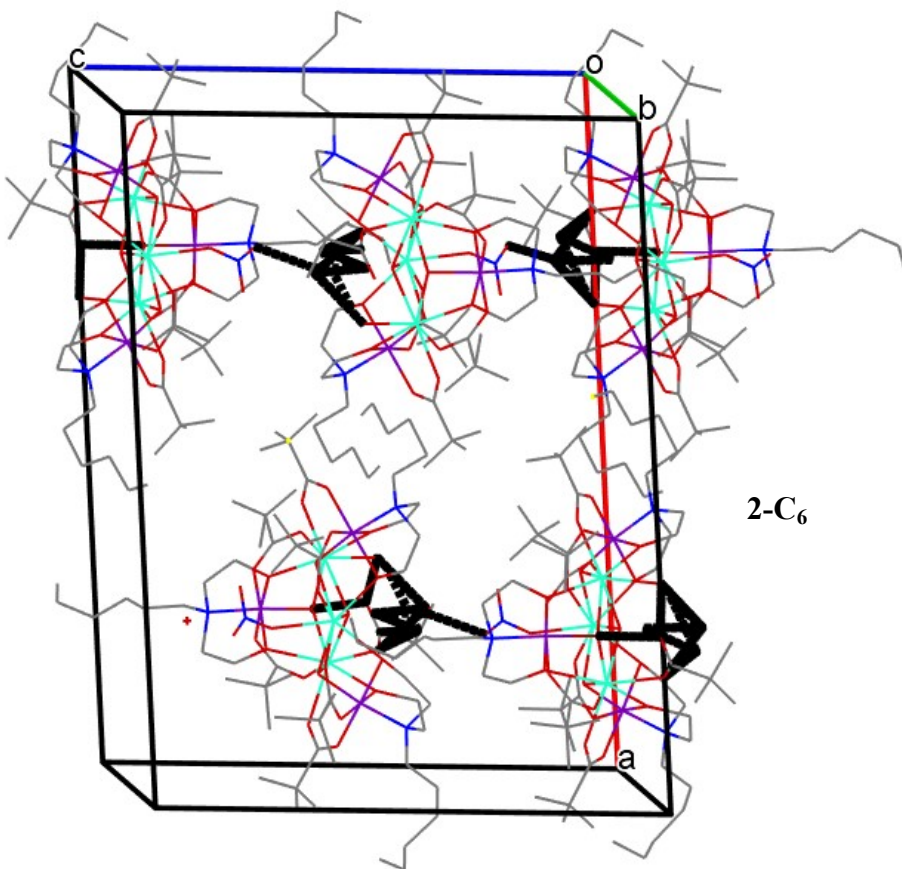



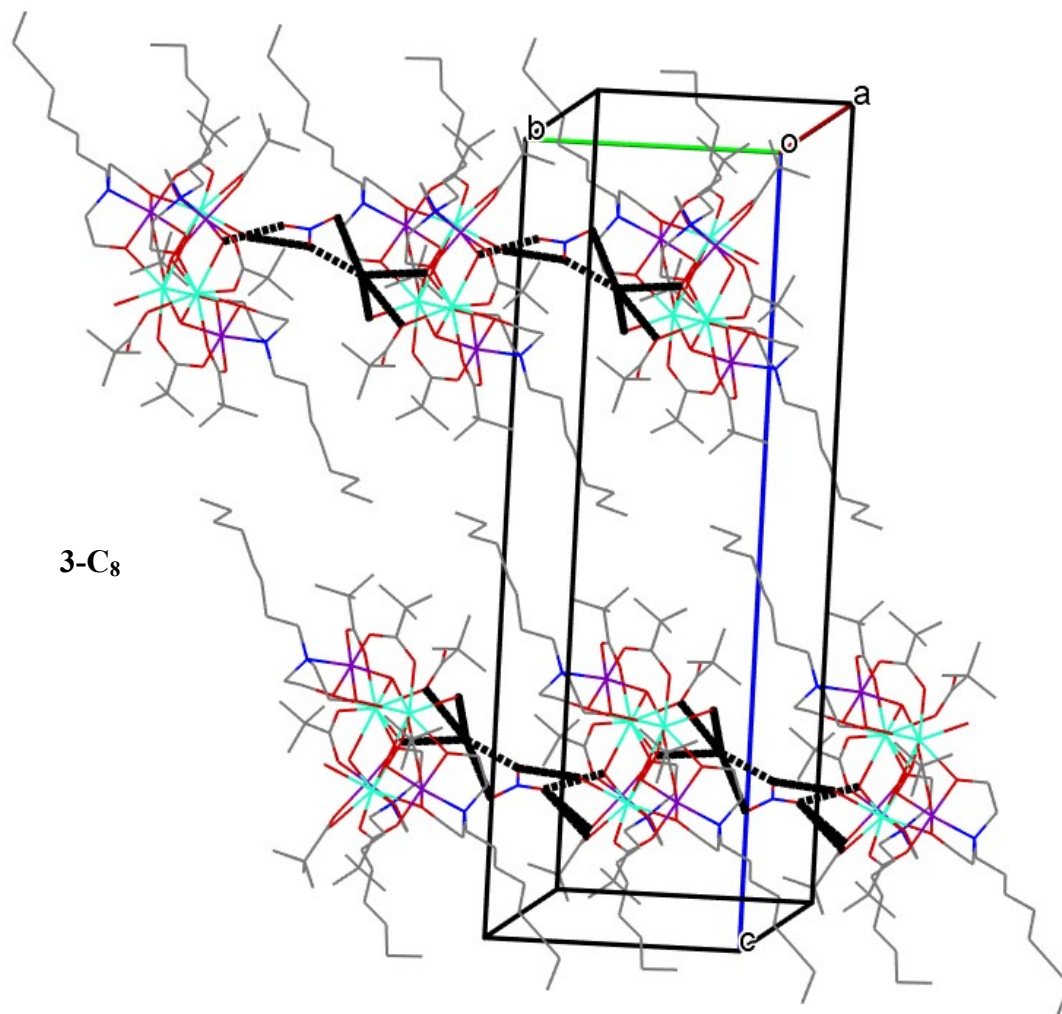

**Figure S7.** Molecular crystal packing showing the H-bond interaction (black dotted lines) and the C-H...C-H ones (black lines). H atoms omitted for sake of clarity.

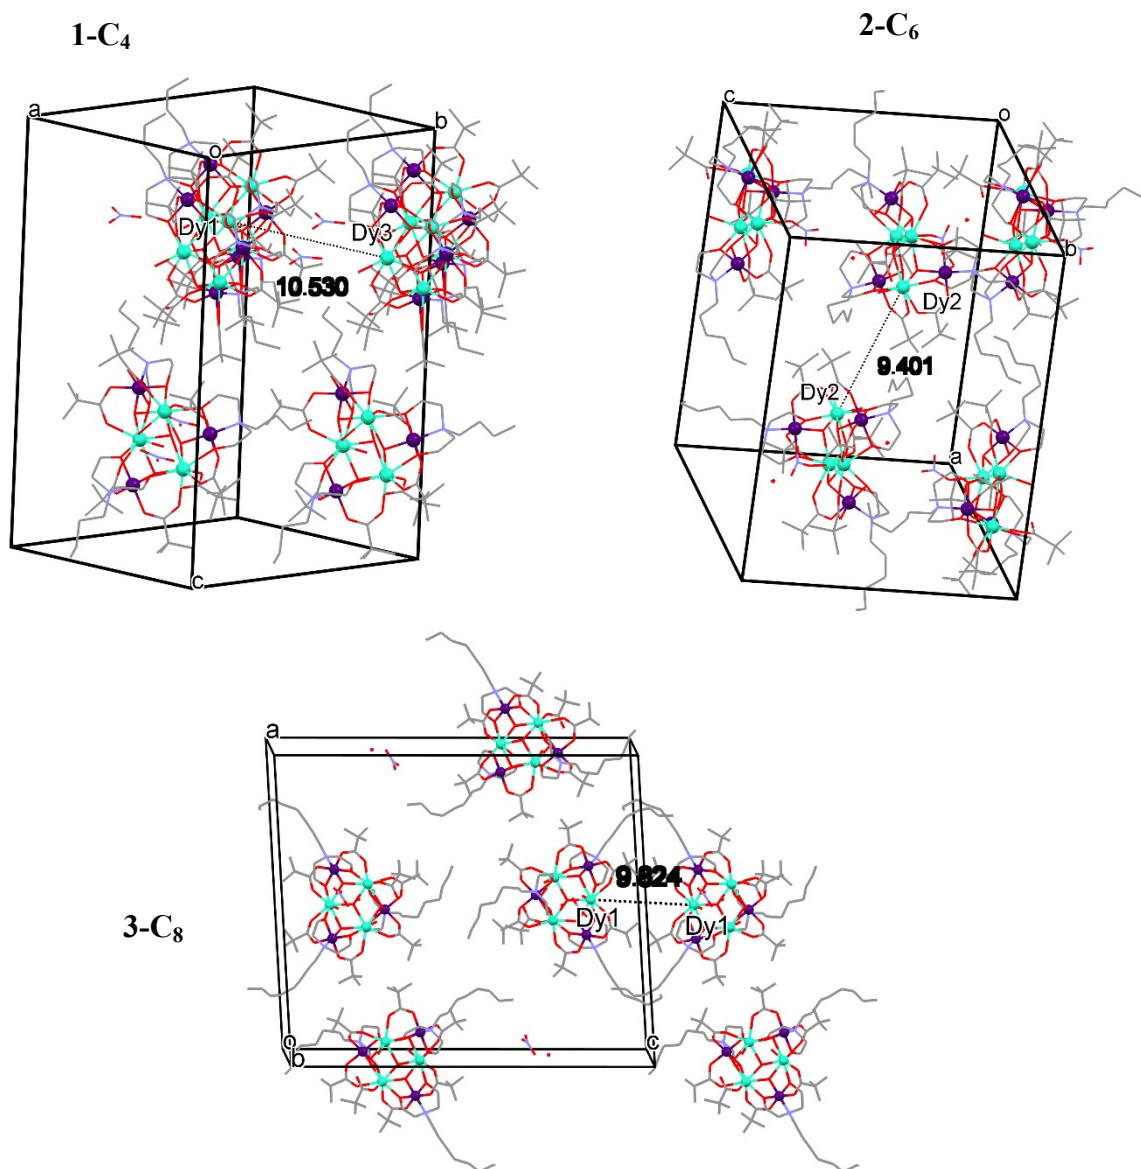

**Figure S8.** Shortest Dy...Dy inter-molecular distances (Å) shown in the crystal packing. H atoms omitted for sake of clarity. Green: Dy; Violet: Co.

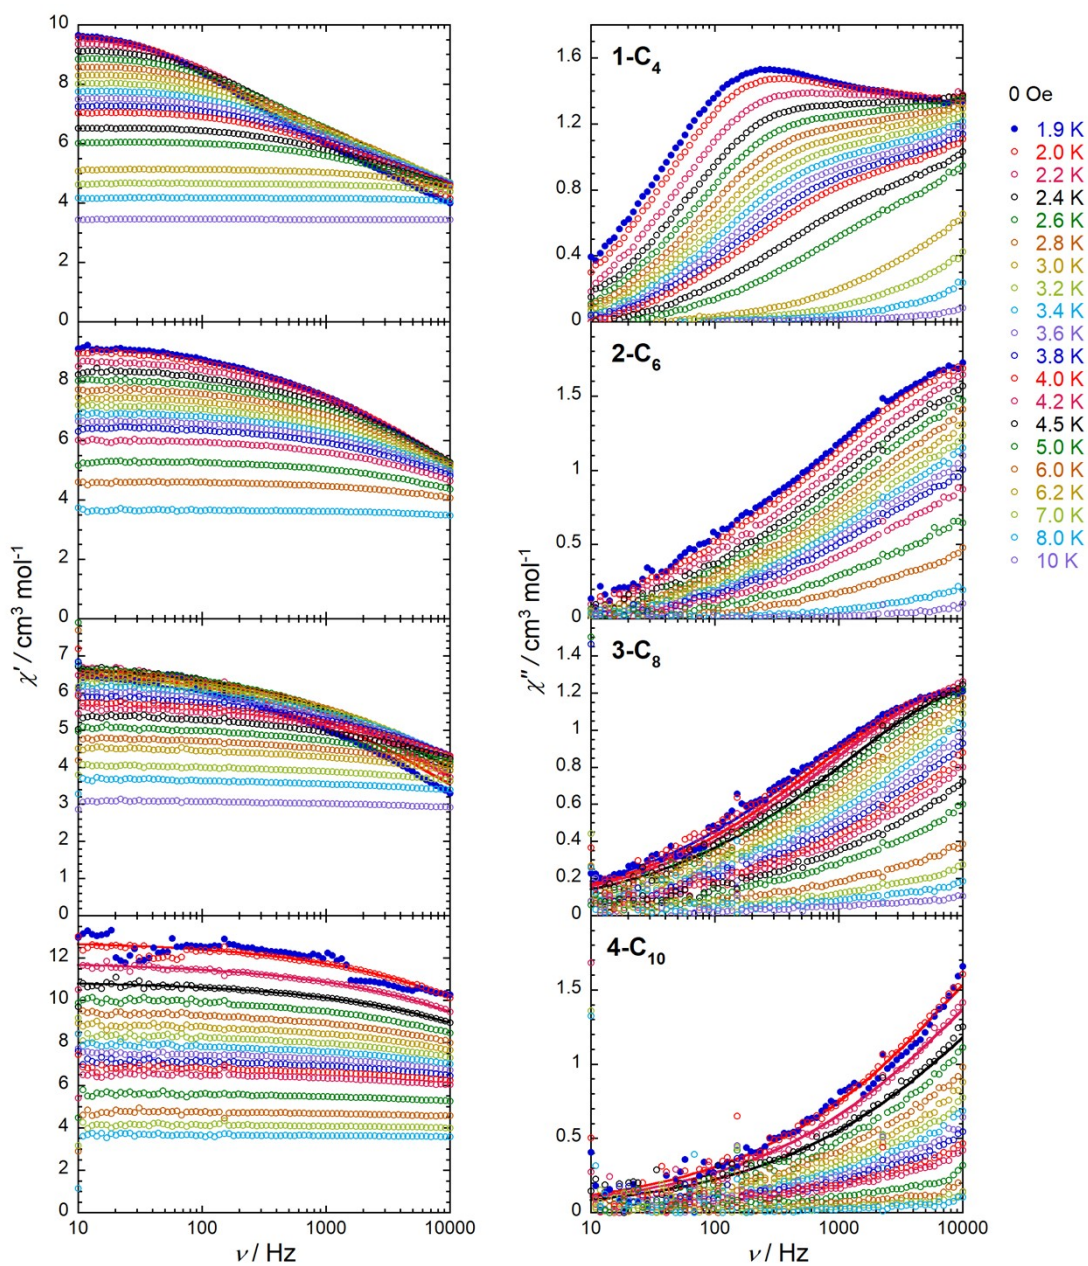

**Figure S9:** Frequency dependence of the in phase (left;  $\chi'$ ) and out of phase (right;  $\chi''$ ) components of the ac susceptibility in zero dc field at indicated temperatures for 1-C<sub>4</sub>, 2-C<sub>6</sub>, 3-C<sub>8</sub> and 4-C<sub>10</sub>. Solid lines are the best fits to a generalized Debye model.

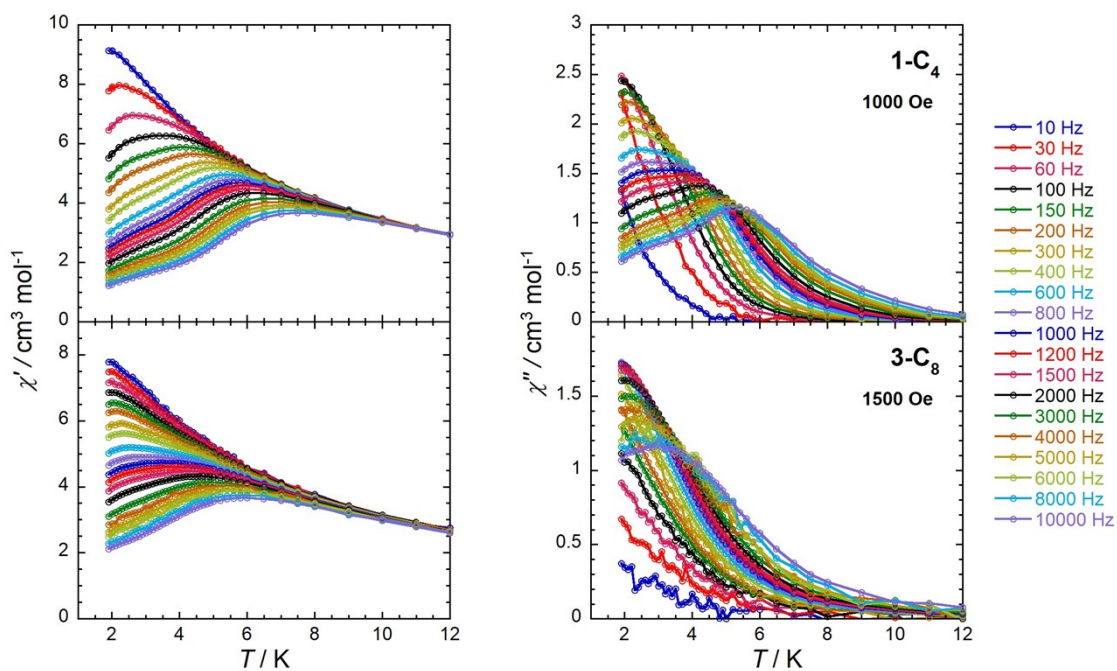

**Figure S10:** Temperature dependence of the in phase (left;  $\chi'$ ) and out of phase (right;  $\chi''$ ) components of the ac susceptibility at optimized dc field and at indicated ac frequencies for **1-C<sub>4</sub>** and **3-C<sub>8</sub>**. Solid lines are guide for the eyes.

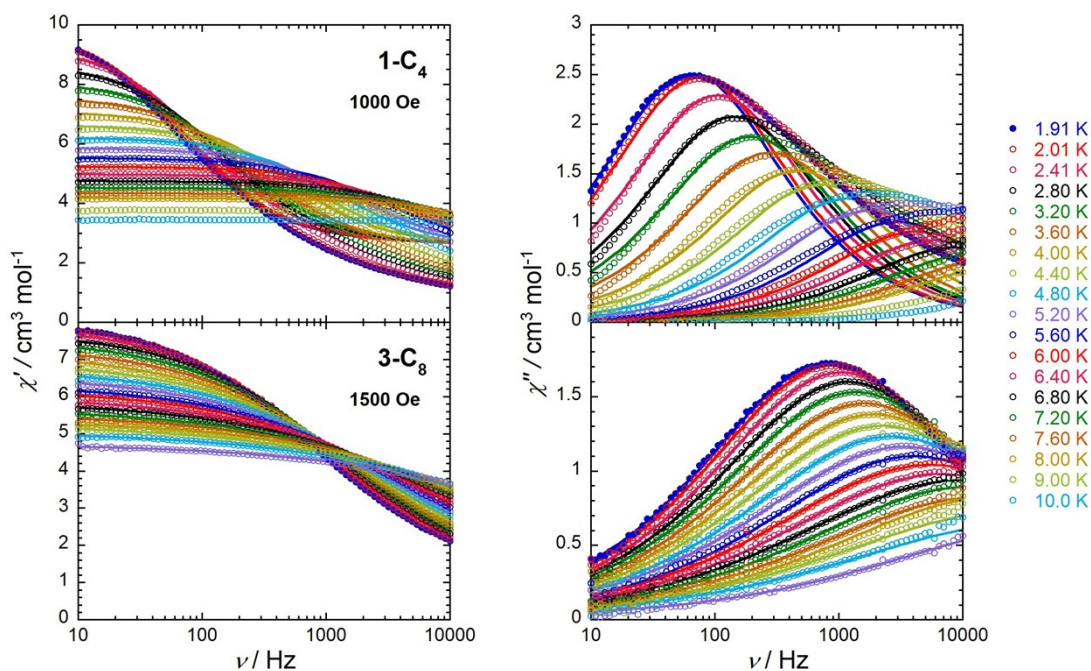

**Figure S11:** Frequency dependence of the in phase (left;  $\chi'$ ) and out of phase (right;  $\chi''$ ) components of the ac susceptibility at optimized dc field and at indicated temperatures for **1-C<sub>4</sub>** and **3-C<sub>8</sub>**. Solid lines are the best fits to a generalized Debye model.

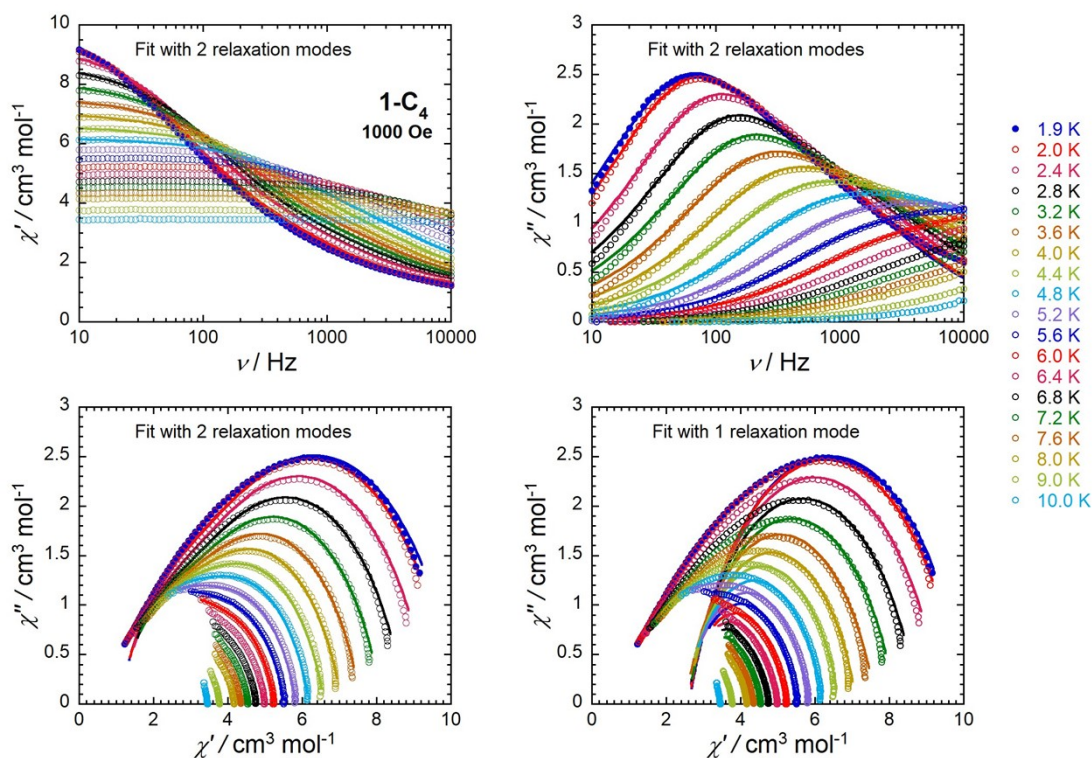

**Figure S12:** Frequency dependence of the in phase (top left;  $\chi'$ ) and out of phase (top right;  $\chi''$ ) components of the ac susceptibility, and the corresponding Cole-Cole plot (bottom left;  $\chi''$  vs  $\chi'$ ) where solid lines are the best fits to a generalized Debye model considering two relaxation modes. For comparison, corresponding Cole-Cole plot (bottom right;  $\chi''$  vs  $\chi'$ ) where solid lines are the best fits to a generalized Debye model considering a single relaxation mode. All the data are shown at 1000 Oe and at indicated temperatures for **1-C<sub>4</sub>**.

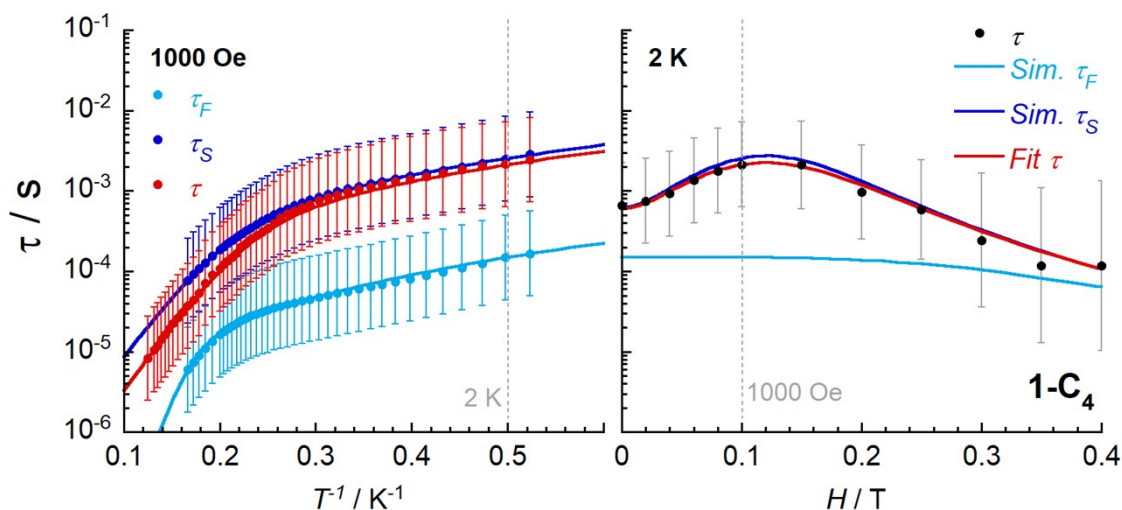

**Figure S13:** Left: Temperature dependence of the relaxation time (plotted as  $\tau$  vs  $T^{-1}$  in semi-logarith scale) at 1000 Oe for **1-C<sub>4</sub>**, considering a unique (red dots;  $\tau$ ) and two relaxation modes (blue and light blue dots;  $\tau_S$ ,  $\tau_F$ ). Solid lines are the best fits to these models as discussed in the main text. Right: Field dependence of the relaxation time (plotted as  $\tau$  vs  $H$  in semi-logarith scale) at 2 K for **1-C<sub>4</sub>**, considering a unique relaxation mode (black dots;  $\tau$ ). Solid lines are the best fits to the model considering a unique relaxation mode (red line), and simulations with the model considering two relaxation modes (blue and light blue lines;  $\tau_S$ ,  $\tau_F$ ), as discussed in the main text.
